# Supplementary material
Source: publisher figshare collection journal article supplement (https://gsajournals.figshare.com/articles/dataset/_/9544832)
Supplement: Supplementary file 1 [file 2]

**A**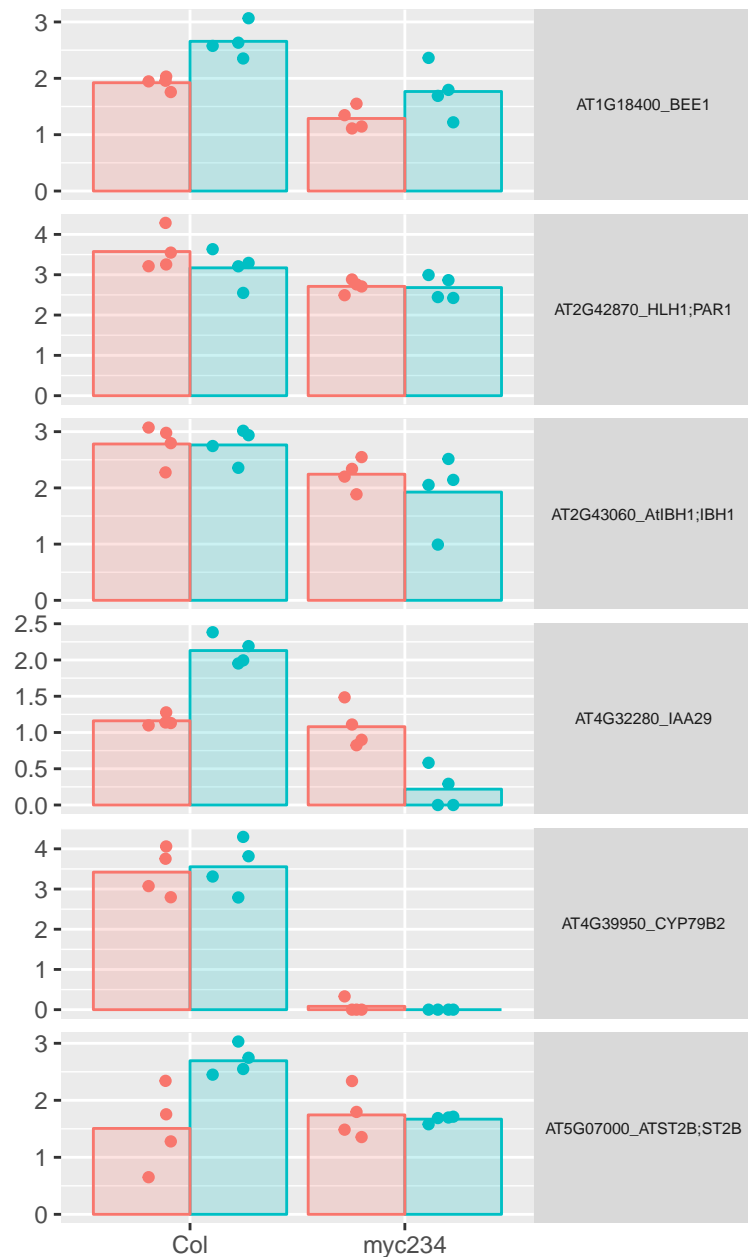**B**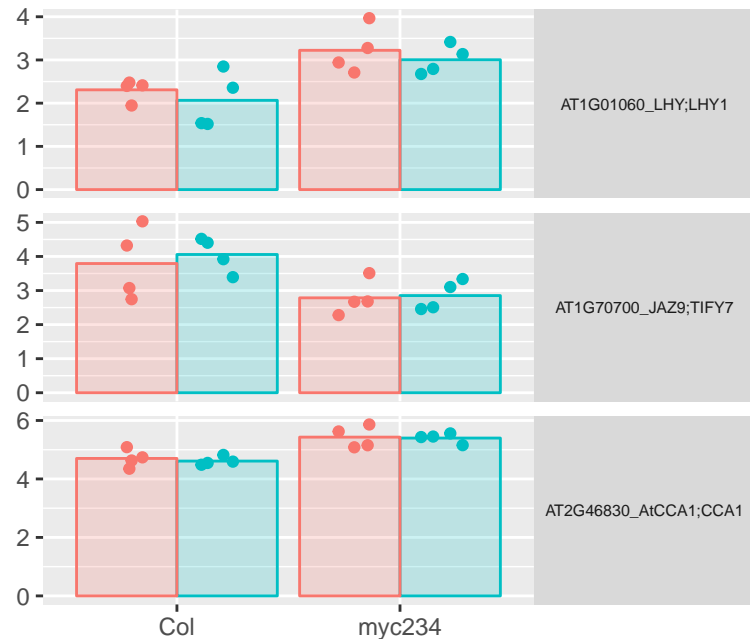

**Supplementary Figure 1. Expression pattern of PIF targets that are mis-regulated in myc2/3/4 mutants.**

Misexpressed genes in myc234 belonging PIF4up or PIFdown category at 49h high R/FR or low R/FR treatments. Y-axis is normalized expression value (log<sub>2</sub>(cpm)).
